# Supplementary material for: Effects of non-covalent binding of lignans with rice starch driven by high-pressure homogenization on the starch structure and in vitro nutritional characteristics
Source: Royal Society of Chemistry journal article supplement (doi:10.1039/d2fo00798c), 2022-01-01
Supplement: d2fo00798c1.pdf [file d2fo00798c1.pdf]

### Figure captions

Fig. S1 Molecular structure of lignans (A. Honokiol, B. Arctiin)

Fig. S2 Standard curve of bile sodium

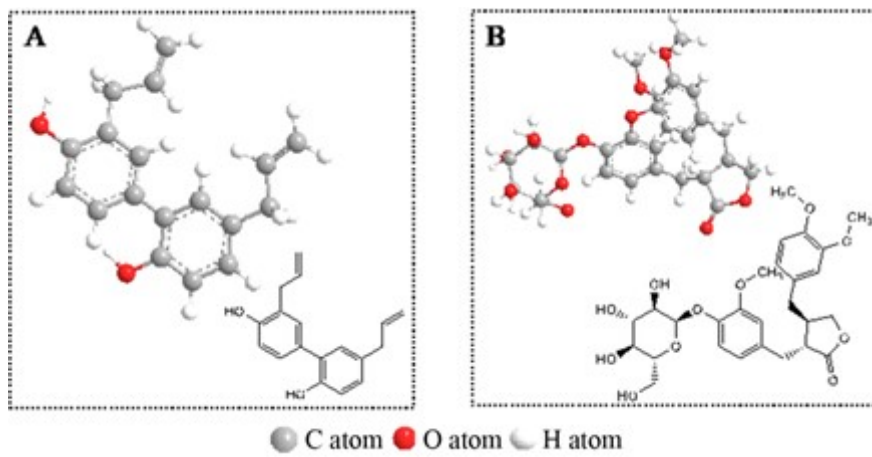

Fig. S1

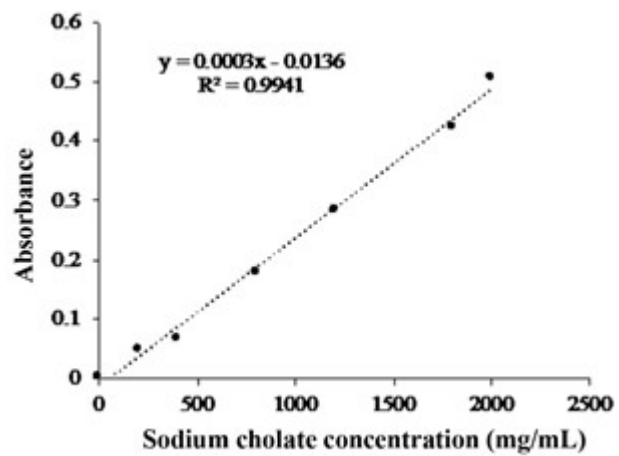

Fig. S2
